# Supplementary material
Source: ML conference proceedings conference paper supplement (https://proceedings.mlr.press/v80/georgogiannis18a.html)
Supplement: Supplementary file [file georgogiannis18a-supp.pdf]

## A. Appendix to: “The Generalization Error of Dictionary Learning with Moreau Envelopes”

### A.1. Proof of Lemma 1

*Proof.* For a proof of (9) and (12) see Corollary 1 in (Georgogiannis, 2016). The continuity of  $e_h$  follows from Theorem 1.25 in (Rockafellar & Wets, 2009). From the calculus rules of the generalized subgradients (Theorem 9.13 and Corollary 10.9 in (Rockafellar & Wets, 2009)):

$$\partial e_h(t) \subseteq t - P_h(t),$$

and since  $t - P_h(t) \geq 0$  (by assumption) for every  $t \geq 0$ , we conclude that  $e_h$  is non-decreasing on  $[0, +\infty)$ .  $\square$

### A.2. Proof of Theorem 1

The proof technique outlined in Section 3 is heavily motivated from the proof of Theorem 2 in (Gribonval et al., 2015b). Since it is quite lengthy, we split it into two parts. In the first part, we prove the Lipschitz continuity of the map  $F : \mathfrak{D} \mapsto \mathcal{F}_{\mathfrak{D}}$  and in the second the UCEM property for  $\mathcal{F}_{\mathfrak{D}}$ .

#### A.2.1. LIPSCHITZ CONTINUITY OF MAP $F : \mathfrak{D} \mapsto \mathcal{F}_{\mathfrak{D}}$

The key in this approach is the following lemma taken from the theory of general metric spaces.

**Lemma 3.** *Let  $(M, \rho)$  and  $(M_1, \rho_1)$  be metric spaces,  $K \subset M$ , and define the map  $F : K \mapsto M_1$ . If  $F$  satisfies*

$$\rho_1(F(x), F(y)) \leq L\rho(x, y), \text{ for any } x, y \in K,$$

*for some  $L > 0$ , i.e.,  $F$  is a Lipschitz continuous map from  $K$  to  $M_1$  with constant  $L$ , then*

$$\mathcal{N}(L\varepsilon, F(K), \rho_1) \leq \mathcal{N}(\varepsilon, K, \rho), \tag{47}$$

*for every  $\varepsilon > 0$ . Here,  $\mathcal{N}(L\varepsilon, F(K), \rho_1)$  and  $\mathcal{N}(\varepsilon, K, \rho)$  denote the covering numbers of the sets  $F(K)$  and  $K$ , under the metrics  $\rho_1$  and  $\rho$ , respectively.*

*Proof.* The proof is quite straightforward; given an  $\varepsilon$ -cover of  $K$  with size  $N$ , say  $\{x_1, \dots, x_N\}$ , and any  $y \in K$ , there exists a  $x_i$  in in the  $\varepsilon$ -cover of  $K$  such that  $\rho(y, x_i) \leq \varepsilon$ . Thus

$$\rho_1(F(y), F(x_i)) \leq L\rho(y, x_i) \leq L\varepsilon.$$

In words, for any point  $F(y)$ , there is a point  $F(x_i)$  such that  $F(y)$  and  $F(x_i)$  are  $L\varepsilon$  close; the set  $\{F(x_1), \dots, F(x_N)\}$  constitutes an  $\varepsilon$ -cover. Since  $\mathcal{N}(L\varepsilon, F(K), \rho_1) \leq |\{F(x_1), \dots, F(x_N)\}|$ , where  $|\{F(x_1), \dots, F(x_N)\}|$  denotes the cardinality of this set, the claim follows.  $\square$

The first step is to define the metrics used on the (metric) spaces spaces  $\mathfrak{D}$  and  $\mathcal{F}_{\mathfrak{D}}$ .

**Definition 6.** *Let  $p, q \geq 1$ . Then, a matrix  $A \in \mathbb{R}^{m \times d}$  can be seen as an operator  $A : (\mathbb{R}^d, \|\cdot\|_p) \mapsto (\mathbb{R}^m, \|\cdot\|_q)$ . The  $l_{p,q}$ -induced norm of  $A$  is*

$$\|A\|_{p,q} := \sup_{\substack{x \in \mathbb{R}^d \\ \|x\|_p=1}} \|Ax\|_q.$$

$\square$

In the sequel,  $\|\cdot\|_{p,q}$  is fixed to  $\|\cdot\|_{1,2}$  which is equivalent to

$$\|A\|_{1,2} = \max_{1 \leq j \leq d} \|A_{\cdot,j}\|_2; \tag{48}$$

$A_{\cdot,j}$  is the  $j$ -th column of  $A \in \mathbb{R}^{m \times d}$  (see also Lemma 17 in (Vainsencher et al., 2011)). The metric on  $\mathcal{F}_{\mathfrak{D}}$  is the supremum norm on the ball  $\mathbb{B}_{\mathbb{R}^m}(T)$ :

$$\|f\|_{\infty} := \sup_{x \in \mathbb{B}_{\mathbb{R}^m}(T)} |f(x)|. \tag{49}$$

If  $f_D \in \mathcal{F}_{\mathfrak{D}}$  and  $g(0) = 0$ , then  $\|f_D\|_{\infty} \leq e_h(\|x - D0\|_2) + g(0) = e_h(T)$  for all  $f_D$  in  $\mathcal{F}_{\mathfrak{D}}$ . Next, define the map  $F : \mathfrak{D} \mapsto \mathcal{F}_{\mathfrak{D}}$  between  $(\mathfrak{D}, \|\cdot\|_{1,2})$  and  $(\mathcal{F}_{\mathfrak{D}}, \|\cdot\|_{\infty})$ . Our aim is to show that  $F$  is uniformly Lipschitz continuous or else, there is a constant  $L > 0$  such that

$$\|F(D) - F(D')\|_{\infty} \leq L\|D - D'\|_{1,2} \text{ for any } D, D' \text{ in } \mathfrak{D}. \quad (50)$$

For this purpose, the technical Lemmas 4, 5, and 6 below are needed.

Lemma 4 states that the infimum over  $a \in \mathbb{R}^d$  in the definition of  $f_D$  is achieved. Fix  $x \in \mathbb{B}_{\mathbb{R}^m}(T)$  and  $D \in \mathbb{R}^{m \times d}$ , and consider the function  $\mathcal{L}_x(D, \cdot) : \mathbb{R}^d \rightarrow \mathbb{R}$  defined as

$$\mathcal{L}_x(D, a) := e_h(\|x - Da\|_2) + g(a). \quad (51)$$

Associate with  $\mathcal{L}_x(D, \cdot)$  the set

$$\mathfrak{U}_0^D(x) := \{a \in \mathbb{R}^d : \mathcal{L}_x(D, a) \leq f_D(x)\}. \quad (52)$$

Set  $\mathfrak{U}_0^D(x)$  contains the values of  $a$  that achieve the minimum value of  $\mathcal{L}_x(D, a)$  for a fixed  $D$  (not necessarily in  $\mathfrak{D}$ ), i.e.,  $\mathfrak{U}_0^D(x) = \operatorname{argmin}_{a \in \mathbb{R}^d} \mathcal{L}_x(D, a)$ . Note that  $f_D(x) = \inf_{a \in \mathbb{R}^d} \mathcal{L}_x(D, a)$  is still well defined but not necessarily in  $\mathcal{F}_{\mathfrak{D}}$ , unless  $D$  has unit-norms columns. As stated below,  $\mathfrak{U}_0^D(x)$  is non-empty and compact for any  $x \in \mathbb{B}_{\mathbb{R}^m}(T)$  and  $D$ .

**Lemma 4.** *Let  $D \in \mathbb{R}^{m \times d}$  and consider any  $x \in \mathbb{B}_{\mathbb{R}^m}(T)$ . The value  $f_D(x) := \inf_{a \in \mathbb{R}^d} \mathcal{L}_x(D, a)$  is finite and  $\operatorname{argmin}_{a \in \mathbb{R}^d} \mathcal{L}_x(D, a)$  is non-empty and compact.*

*Proof.* Let  $f_D(x) = \inf_{a \in \mathbb{R}^d} \mathcal{L}_x(D, a)$ ; because  $\mathcal{L}_x(D, \cdot)$  is proper (as a sum of proper functions),  $f_D(x) < +\infty$ .<sup>4</sup> For some  $\beta \in (f_D(x), +\infty)$ , the level set  $\operatorname{lev}_{\leq \beta} \mathcal{L}_x(D, \cdot) := \{a \in \mathbb{R}^d : \mathcal{L}_x(D, a) \leq \beta\}$  is non-empty; it is closed because  $\mathcal{L}_x(D, \cdot)$  is lsc (in fact it is continuous) as the sum of two continuous functions and bounded because both  $e_h$  and  $g$  are non-decreasing (and not constant) as  $\|a\|_2 \rightarrow +\infty$ . The sets  $\operatorname{lev}_{\leq \beta} \mathcal{L}_x(D, \cdot)$  for  $\beta \in (f_D(x), +\infty)$  are therefore compact and nested:  $\operatorname{lev}_{\leq \beta} \mathcal{L}_x(D, \cdot) \subset \operatorname{lev}_{\leq \beta'} \mathcal{L}_x(D, \cdot)$  when  $\beta < \beta'$ . The intersection of this family of sets, which is  $\operatorname{lev}_{\leq f_D(x)} \mathcal{L}_x(D, \cdot)$ , is therefore non-empty and compact. Since  $\mathcal{L}_x(D, \cdot)$  does not take the value  $-\infty$  nowhere, we conclude that  $f_D(x)$  is finite. Under the previous assumptions,  $\inf_{a \in \mathbb{R}^d} \mathcal{L}_x(D, a)$  can be written as  $\min_{a \in \mathbb{R}^d} \mathcal{L}_x(D, a)$  and the claim follows.  $\square$

**Remark 3.** *In most cases of interest, the functions  $e_h$  and  $g$  are bounded from above, i.e.,  $\sup_{x \in \mathbb{B}_{\mathbb{R}^m}(T)} e_h(x)$  and  $\sup_{x \in \mathbb{B}_{\mathbb{R}^m}(T)} g(x)$  are finite. So, the value of  $\beta$  in Lemma 4 could be the minimum of the latter two supremas. Also, it is easily gleaned from the proof of Lemma 4 that its conclusions still hold for any non-decreasing lsc function  $g$ .  $\square$*

Next, a bound for the absolute value of the difference between  $|e_h(x) - e_h(x')|$  when  $h$  satisfies the assumptions in Lemma 1 is given; these assumptions on  $h$  remain valid throughout the article.

**Lemma 5.** *Let  $e_h(x) := \inf_{z \in \mathbb{R}^m} \frac{1}{2}\|x - z\|_2^2 + h(z)$ , where  $h : \mathbb{R}^m \rightarrow \mathbb{R}$  is lsc and proper. Then*

$$|e_h(x) - e_h(x')| \leq \frac{1}{2}\|x - x'\|_2^2, \quad (53)$$

for any  $x, x'$  in  $\mathbb{R}^m$ .

<sup>4</sup>We call  $f$  proper if  $f(x) < \infty$  for at least one  $x \in \mathbb{R}^n$ , and  $f(x) > -\infty$  for all  $x \in \mathbb{R}^n$ ; in words, if the domain of  $f$  is a nonempty set on which  $f$  is finite, see page 5 in (Rockafellar & Wets, 2009).

*Proof.* Let  $x$  and  $x'$  in  $\mathbb{R}^m$ . Then:

$$\begin{aligned}
 e_h(x) - e_h(x') &= \inf_{z \in \mathbb{R}^d} \left\{ \frac{1}{2} \|x - z\|_2^2 + g(z) \right\} - \inf_{o \in \mathbb{R}^d} \left\{ \frac{1}{2} \|x' - o\|_2^2 + g(o) \right\} \\
 &\leq \inf_{z \in \mathbb{R}^d} \left\{ \frac{1}{2} \|x - z\|_2^2 + g(z) \right\} + \sup_{o \in \mathbb{R}^d} \left\{ -\frac{1}{2} \|x' - o\|_2^2 - g(o) \right\} \\
 &= \sup_{o \in \mathbb{R}^d} \left\{ \inf_{z \in \mathbb{R}^d} \left\{ \frac{1}{2} \|x - z\|_2^2 + g(z) \right\} - \frac{1}{2} \|x' - o\|_2^2 - g(o) \right\} \\
 &\leq \sup_{o \in \mathbb{R}^d} \left\{ \frac{1}{2} \|x - o\|_2^2 + g(o) - \frac{1}{2} \|x' - o\|_2^2 - g(o) \right\} \\
 &\leq \sup_{o \in \mathbb{R}^d} \left\{ \frac{1}{2} \|x - o\|_2^2 - \frac{1}{2} \|x' - o\|_2^2 \right\} \\
 &\leq \frac{1}{2} \|x - x'\|_2^2.
 \end{aligned} \tag{54}$$

Interchanging the roles of  $x$  and  $x'$ , we conclude the result.  $\square$

**Lemma 6.** Fix  $x \in \mathbb{B}_{\mathbb{R}^m}(T)$  and let  $D, D' \in \mathbb{R}^{m \times d}$ . If there exist non-negative constants  $C_{D,x}$  and  $C_{D',x}$ , such that  $\sup_{a \in \mathfrak{U}_0^D(x)} \|a\|_1 \leq C_{D,x}$  and  $\sup_{a \in \mathfrak{U}_0^{D'}(x)} \|a\|_1 \leq C_{D',x}$ , then

$$\frac{|F(D) - F(D')|}{\|D' - D\|_{1,2}} \leq \frac{1}{2} \|D' - D\|_{1,2} \max\{C_{D,x}, C_{D',x}\}^2, \tag{55}$$

*Proof.* Fix  $x$  in  $\mathbb{B}_{\mathbb{R}^m}(T)$  and let  $D, D' \in \mathbb{R}^{m \times d}$ . The function  $f_{D'}(x)$  is upper bounded as

$$\begin{aligned}
 F(D') &= f_{D'}(x) := \inf_{a \in \mathbb{R}^d} \{e_h(\|x - D'a\|_2) + g(a)\} \\
 &= \inf_{a \in \mathbb{R}^d} \{e_h(\|x - D'a\|_2) + g(a) - e_h(\|x - Da\|_2) + e_h(\|x - Da\|_2)\} \\
 &\leq \inf_{a \in \mathbb{R}^d} \{e_h(\|x - Da\|_2) + g(a) + \frac{1}{2} \|D'a - Da\|_2^2\} \quad (\text{from Lemma 5}) \\
 &\leq \sup_{a \in \mathfrak{U}_0^D(x)} \{e_h(\|x - Da\|_2) + g(a) + \frac{1}{2} \|D'a - Da\|_2^2\} \quad (\text{since } \mathfrak{U}_0^D(x) \text{ is non-empty}) \\
 &\leq \sup_{a \in \mathfrak{U}_0^D(x)} \{e_h(\|x - Da\|_2) + g(a)\} + \sup_{a \in \mathfrak{U}_0^D(x)} \frac{1}{2} \|D'a - Da\|_2^2 \\
 &= f_D(x) + \sup_{a \in \mathfrak{U}_0^D(x)} \frac{1}{2} \|D'a - Da\|_2^2 \quad (\text{by definition of } \mathfrak{U}_0^D(x)) \\
 &\leq f_D(x) + \frac{1}{2} \|D' - D\|_{1,2}^2 \sup_{a \in \mathfrak{U}_0^D(x)} \|a\|_1^2 \quad (\text{by definition of the } \|\cdot\|_{1,2}\text{-norm}) \\
 &= F(D) + \frac{1}{2} \|D' - D\|_{1,2}^2 \sup_{a \in \mathfrak{U}_0^D(x)} \|a\|_1^2,
 \end{aligned} \tag{56}$$

or else

$$\frac{F(D') - F(D)}{\|D' - D\|_{1,2}} \leq \frac{1}{2} \|D' - D\|_{1,2} \sup_{a \in \mathfrak{U}_0^D(x)} \|a\|_1^2. \tag{57}$$

Interchanging the roles of  $D$  and  $D'$  in (56),

$$\frac{F(D) - F(D')}{\|D' - D\|_{1,2}} \leq \frac{1}{2} \|D' - D\|_{1,2} \sup_{a \in \mathfrak{U}_0^{D'}(x)} \|a\|_1^2, \tag{58}$$

and thus the inequalities

$$-\frac{1}{2} \|D' - D\|_{1,2} \sup_{a \in \mathfrak{U}_0^D(x)} \|a\|_1^2 \leq \frac{F(D) - F(D')}{\|D' - D\|_{1,2}} \leq \frac{1}{2} \|D' - D\|_{1,2} \sup_{a \in \mathfrak{U}_0^{D'}(x)} \|a\|_1^2, \tag{59}$$

hold true.

From (59),

$$-\frac{1}{2}\|D' - D\|_{1,2} \max\{C_{D,x}, C_{D',x}\}^2 \leq \frac{F(D) - F(D')}{\|D' - D\|_{1,2}} \leq \frac{1}{2}\|D' - D\|_{1,2} \max\{C_{D,x}, C_{D',x}\}^2 \quad (60)$$

and the result follows.  $\square$

Without loss of generality assume that  $C_{D',x} \leq C_{D,x}$ .

**Proposition 6.** Fix  $x \in \mathbb{B}_{\mathbb{R}^m}(T)$  and let  $C_{D,x} > 0$  be a finite upper bound for  $\sup_{a \in \mathcal{U}_0^D(x)} \|a\|_1$ . Then, for any  $D, D' \in \mathbb{R}^{m \times d}$ , we have

$$|F(D) - F(D')| \leq \frac{1}{2}C_{D,x}\|D - D'\|_{1,2}. \quad (61)$$

*Proof.* The following proof is an adaption of the proof of Theorem 2 in (Gribonval et al., 2015b). Fix  $\varepsilon > 0$ . From inequality (55),

$$|F(D) - F(D')| \leq \frac{(1 + \varepsilon)}{2}C_{D,x}\|D - D'\|_{1,2},$$

whenever  $\delta := \|D - D'\|_{1,2} \leq \frac{1 + \varepsilon}{C_{D,x}}$ . If  $\delta > \frac{1 + \varepsilon}{C_{D,x}}$ , then choose an integer  $k > 0$  such that  $\frac{\delta}{k} \leq \frac{1 + \varepsilon}{C_{D,x}}$  and construct the sequence

$$D_i = D + \frac{i}{k}(D - D'), \quad \text{with } i = 0, \dots, k - 1. \quad (62)$$

For this sequence of  $D_i$ 's,

$$\|D_{i+1} - D_i\|_{1,2} = \frac{\|D - D'\|_{1,2}}{k} \leq \frac{1 + \varepsilon}{C_{D,x}}, \quad (63)$$

and

$$\begin{aligned} |F(D_{i+1}) - F(D_i)| &\leq \frac{1}{2}C_{D,x}^2\|D_{i+1} - D_i\|_{1,2}^2 \\ &\leq \frac{1 + \varepsilon}{2}C_{D,x}\|D_{i+1} - D_i\|_{1,2} \quad (\text{from (63)}). \end{aligned}$$

Also,

$$\begin{aligned} |F(D) - F(D')| &\leq \sum_{i=0}^{k-1} |F(D_{i+1}) - F(D_i)| \\ &\leq \frac{(1 + \varepsilon)}{2}C_{D,x} \sum_{i=0}^{k-1} \|D_{i+1} - D_i\|_{1,2} \\ &= \frac{(1 + \varepsilon)}{2}C_{D,x} \sum_{i=0}^{k-1} \frac{\|D - D'\|_{1,2}}{k} \\ &= \frac{(1 + \varepsilon)}{2}C_{D,x}\|D - D'\|_{1,2}. \end{aligned}$$

Since  $\varepsilon$  was arbitrary we conclude the result.  $\square$

And now the final step in the proof for the Lipschitz continuity of  $F : \mathfrak{D} \mapsto \mathcal{F}_{\mathfrak{D}}$ ; what remains is to find an upper bound for  $C_{D,x}$  when  $D \in \mathfrak{D}$ ,  $x \in \mathbb{B}_{\mathbb{R}^m}(T)$ , and  $a \in \mathcal{U}_0^D(x)$ . Note that

$$\begin{aligned} \mathcal{L}_x(D, a) &= e_h(\|x - Da\|_2) + g(a) \\ &\leq f_D(x) = \inf_{a \in \mathbb{R}^d} \{e_h(\|x - Da\|_2) + g(a)\} \quad (\text{since } a \in \mathcal{U}_0^D(x)) \\ &\leq e_h(\|x\|_2) \quad (\text{for } a = 0) \end{aligned} \quad (64)$$

and consequently

$$g(a) \leq e_h(\|x\|_2). \quad (65)$$

In the sequel, an upper bound for the  $l_1$ -norm of  $a \in \mathfrak{U}_0^D(x)$  is inferred from (65); this bound depends on the  $l_2$ -norm of  $x$ . For example, when  $g(a) = \|a\|_p$ , for  $1 \leq p < \infty$ , Hölder's inequality yields

$$\begin{aligned} \|a\|_1 &= \sum_{i=1}^d |a_i| \leq \left( \sum_{i=1}^d |a_i|^p \right)^{1/p} \left( \sum_{i=1}^d 1^{1/(1-1/p)} \right)^{1-1/p} \\ &= d^{1-1/p} \|a\|_p. \end{aligned} \quad (66)$$

From (65) and (66) the following implications hold true

$$a \in \mathfrak{U}_0^D(x) \Rightarrow \|a\|_p \leq e_h(\|x\|_2) \Rightarrow \|a\|_1 \leq d^{1-1/p} e_h(\|x\|_2). \quad (67)$$

For the non-convex case of the  $l_p$ -norm,  $0 < p < 1$ , for any  $D$  and  $x$  (see Section III in (Gribonval et al., 2015b))

$$a \in \mathfrak{U}_0^D(x) \Rightarrow \|a\|_p \leq e_h(\|x\|_2) \Rightarrow \|a\|_1 \leq d^{\max\{0, 1-1/p\}} e_h(\|x\|_2). \quad (68)$$

In the general case where  $g(a) = \sum_{i=1}^d \hat{g}(a_i)$  and  $\hat{g}$  is continuous, even, and strictly increasing on  $[0, +\infty)$ , such as the log-penalty function  $g_{\log}(\cdot) : \mathbb{R}^d \rightarrow \mathbb{R}_+$  below,

$$g_{\log}(a; \gamma) = \sum_{i=1}^d \underbrace{\frac{1}{\gamma+1} \log(\gamma|a_i| + 1)}_{\hat{g}_{\log}(\cdot; \gamma) : \mathbb{R} \rightarrow \mathbb{R}_+}, \quad \gamma > 0,$$

then Lemma 7 gives a rough upper bound for  $\sup_{a \in \mathfrak{U}_0^D(x)} \|a\|_1$  that depends on  $x$  as follows.

**Lemma 7.** *Let  $D \in \mathbb{R}^{m \times d}$  and assume that  $\hat{g} : \mathbb{R}^d \rightarrow \mathbb{R}_+$  is an i) even, ii) continuous, and iii) strictly increasing function on  $[0, +\infty)$ . Also, let  $g(a) := \sum_{i=1}^d \hat{g}(a_i)$ . Then*

$$a \in \mathfrak{U}_0^D(x) \Rightarrow g(a) \leq e_h(\|x\|_2) \Rightarrow \|a\|_1 \leq C_{D,x}, \quad (69)$$

where  $C_{D,x} := d\hat{g}^{-1}(e_h(\|x\|_2))$  and  $\hat{g}^{-1} : \mathbb{R}_+ \rightarrow \mathbb{R}_+$  is the inverse function of  $\hat{g}$  on  $[0, \infty)$ .

*Proof.* It holds true that

$$\begin{aligned} g(a) &= \sum_{i=1}^d \hat{g}(a_i) \leq e_h(\|x\|_2) \quad (\text{from inequality (65)}) \\ &\Rightarrow \max_{1 \leq i \leq d} \hat{g}(a_i) \leq e_h(\|x\|_2) \\ &\Rightarrow |a_i| \leq \hat{g}^{-1}(e_h(\|x\|_2)) \quad (\text{since } \hat{g} \text{ is continuous and increasing}) \\ &\Rightarrow \|a\|_1 \leq d\hat{g}^{-1}(e_h(\|x\|_2)). \end{aligned} \quad (70)$$

□

As a corollary of  $e_h(\|x\|_2) \leq e_h(T)$ ,  $x \in \mathbb{B}_{\mathbb{R}^m}(T)$  it holds true that

$$a \in \mathfrak{U}_0^D(x) \Rightarrow \|a\|_1 \leq d\hat{g}^{-1}(e_h(\|x\|_2)) \leq d\hat{g}^{-1}(e_h(T)) \quad (71)$$

for any  $D \in \mathbb{R}^{m \times d}$ ; thus  $d\hat{g}^{-1}(e_h(T))$  is an upper bound for  $C_{D,x}$ . Next proposition states that  $F : \mathfrak{D} \mapsto \mathcal{F}_{\mathfrak{D}}$  is Lipschitz continuous. Its proof is a combination of Proposition 6, expression (71), and the monotonicity of  $\hat{g}^{-1}$  on  $[0, +\infty)$ .

**Proposition 7.** For any  $x \in \mathbb{B}_{\mathbb{R}^m}(T)$  and any  $D \in \mathfrak{D}$  it holds

$$\sup_{a \in \mathfrak{U}_0^D(x)} \|a\|_1 \leq d\hat{g}^{-1}(e_h(T)). \quad (72)$$

Thus, the map  $F : (\mathfrak{D}, \|\cdot\|_{1,2}) \mapsto (\mathcal{F}_{\mathfrak{D}}, \|\cdot\|_{\infty})$  is Lipschitz continuous, i.e.,

$$\|F(D) - F(D')\|_{\infty} \leq C_{\mathfrak{D}} \|D - D'\|_{1,2}, \quad (73)$$

where

$$C_{\mathfrak{D}} := \frac{d\hat{g}^{-1}(e_h(T))}{2} \quad (74)$$

is the Lipschitz constant.

#### A.2.2. PROOF OF THEOREM 1: THE UCEM PROPERTY FOR $\mathcal{F}_{\mathfrak{D}}$

The deeper meaning of Proposition 7 is that it allows us to invoke Lemma 3 and upper bound  $\mathcal{N}_{\infty}(\varepsilon, \mathcal{F}_{\mathfrak{D}})$  in terms of the covering number  $\mathcal{N}(\varepsilon, \mathfrak{D}, \|\cdot\|_{1,2})$ .

**Lemma 8.** The following inequality between the covering numbers of the spaces  $\mathcal{F}_{\mathfrak{D}}$  and  $\mathfrak{D}$  is valid,

$$\mathcal{N}_{\infty}(\varepsilon, \mathcal{F}_{\mathfrak{D}}) \leq \mathcal{N}\left(\frac{\varepsilon}{C_{\mathfrak{D}}}, \mathfrak{D}, \|\cdot\|_{1,2}\right). \quad (75)$$

*Proof.* The proof is a direct application of Lemma 3, Proposition 6, and Proposition 7. □

A well known result for the covering number of the dictionary space  $\mathfrak{D}$  is the following.

**Lemma 9** (Lemma 15 in (Gribonval et al., 2015b)). The covering number of the space  $\mathfrak{D} \subset \mathbb{R}^{m \times d}$  is upper bounded as

$$\mathcal{N}(\varepsilon, \mathfrak{D}, \|\cdot\|_{1,2}) \leq \left(\frac{3}{\varepsilon}\right)^{md}. \quad (76)$$

The next result is a combination of Lemma 8 and Lemma 9. It states that the size of every minimal  $\varepsilon$ -cover of  $\mathcal{F}_{\mathfrak{D}}$ , say  $\mathcal{F}_{\mathfrak{D},\varepsilon}$ , is upper bounded by  $\left(\frac{3C_{\mathfrak{D}}}{\varepsilon}\right)^{md}$ .

**Corollary 1.** The covering number of the function class  $\mathcal{F}_{\mathfrak{D}}$  is upper bounded as

$$\mathcal{N}_{\infty}(\varepsilon, \mathcal{F}_{\mathfrak{D}}) \leq \left(\frac{3C_{\mathfrak{D}}}{\varepsilon}\right)^{md}. \quad (77)$$

We are ready to state the proof of Theorem 1 about the UCEM property for  $\mathcal{F}_{\mathfrak{D}}$ .

*Proof.* Let  $\mathcal{F}_{\mathfrak{D},\frac{\varepsilon}{3}}$  be an  $\frac{\varepsilon}{3}$  proper cover of  $\mathcal{F}_{\mathfrak{D}}$  w.r.t  $\|\cdot\|_{\infty} := \sup_{x \in \mathbb{B}_{\mathbb{R}^m}(T)} |f_D(x)|$  of minimal cardinality. Fix  $f_D \in \mathcal{F}_{\mathfrak{D}}$ . Then, there exists  $f \in \mathcal{F}_{\mathfrak{D},\frac{\varepsilon}{3}}$  such that,  $\|f_D - f\|_{\infty} < \frac{\varepsilon}{3}$ , thus

$$\begin{aligned} \left| \frac{1}{n} \sum_{i=1}^n f_D(x_i) - \int f_D d\mu \right| &\leq \left| \frac{1}{n} \sum_{i=1}^n f_D(x_i) - \frac{1}{n} \sum_{i=1}^n f(x_i) \right| + \left| \frac{1}{n} \sum_{i=1}^n f(x_i) - \int f d\mu \right| \\ &\quad + \left| \int f d\mu - \int f_D d\mu \right| \\ &\leq \|f - f_D\|_{\infty} + \left| \frac{1}{n} \sum_{i=1}^n f(x_i) - \int f d\mu \right| + \|f - f_D\|_{\infty} \\ &< \frac{2}{3}\varepsilon + \left| \frac{1}{n} \sum_{i=1}^n f(x_i) - \int f d\mu \right|. \end{aligned} \quad (78)$$

Thus

$$\begin{aligned}
 \mathbb{P} \left\{ \sup_{f_D \in \mathcal{F}_{\mathcal{D}}} \left| \frac{1}{n} \sum_{i=1}^n f_D(X_i) - \int f_D d\mu \right| > \varepsilon \right\} \\
 \leq \mathbb{P} \left\{ \sup_{f \in \mathcal{F}_{\mathcal{D}, \frac{\varepsilon}{3}}} \left| \frac{1}{n} \sum_{i=1}^n f(X_i) - \int f d\mu \right| > \frac{\varepsilon}{3} \right\} \\
 \leq \bigcup_{f \in \mathcal{F}_{\mathcal{D}, \frac{\varepsilon}{3}}} \mathbb{P} \left\{ \left| \frac{1}{n} \sum_{i=1}^n f(X_i) - \int f d\mu \right| > \frac{\varepsilon}{3} \right\}.
 \end{aligned} \tag{79}$$

From Hoeffding's inequality and  $\sup_{x \in \mathbb{B}_{\mathbb{R}^m}(T)} |f(x)| \leq e_h(T)$ , for all  $f \in \mathcal{F}_{\mathcal{D}, \varepsilon}$

$$\mathbb{P} \left\{ \left| \frac{1}{n} \sum_{i=1}^n f(X_i) - \int f d\mu \right| > \frac{\varepsilon}{3} \right\} \leq 2e^{-\frac{2n\varepsilon^2}{9e_h(T)^2}}. \tag{80}$$

Applying the union bound in (79) together with the fact that  $\mathcal{F}_{\mathcal{D}, \frac{\varepsilon}{3}}$  has finite size  $\left(\frac{9C_{\mathcal{D}}}{\varepsilon}\right)^{md}$ ,

$$\begin{aligned}
 \bigcup_{f \in \mathcal{F}_{\mathcal{D}, \frac{\varepsilon}{3}}} \mathbb{P} \left\{ \left| \frac{1}{n} \sum_{i=1}^n f(X_i) - \int f d\mu \right| > \frac{\varepsilon}{3} \right\} \\
 \leq \sum_{f \in \mathcal{F}_{\mathcal{D}, \frac{\varepsilon}{3}}} \mathbb{P} \left\{ \left| \frac{1}{n} \sum_{i=1}^n f(X_i) - \int f d\mu \right| > \frac{\varepsilon}{3} \right\} \\
 \stackrel{(80)}{\leq} 2 \left(\frac{9C_{\mathcal{D}}}{\varepsilon}\right)^{md} e^{-\frac{2n\varepsilon^2}{9e_h(T)^2}}.
 \end{aligned} \tag{81}$$

The proof of (22) is finished. To prove

$$\sup_{f_D \in \mathcal{F}_{\mathcal{D}}} \left| \frac{1}{n} \sum_{i=1}^n f_D(X_i) - \int f_D d\mu \right| \rightarrow 0 \quad \text{almost surely (as } n \rightarrow \infty), \tag{82}$$

note that the inequality

$$\sum_{n=1}^{\infty} \left(\frac{9C_{\mathcal{D}}}{\varepsilon}\right)^{md} e^{-\frac{2n\varepsilon^2}{9e_h(T)^2}} < \infty \tag{83}$$

clearly holds for any (fixed)  $\varepsilon > 0$ . This implies

$$\sum_{n=1}^{\infty} \mathbb{P} \left\{ \sup_{f_D \in \mathcal{F}_{\mathcal{D}}} \left| \frac{1}{n} \sum_{i=1}^n f_D(X_i) - \int f_D d\mu \right| > \frac{1}{k} \right\} < \infty,$$

for each  $k \in \mathbb{N}_+$ . The Borel-Cantelli Lemma states that, if the sum of the probabilities of the events

$$E_n = \left\{ \omega : \sup_{f_D \in \mathcal{F}_{\mathcal{D}}} \left| \frac{1}{n} \sum_{i=1}^n f_D(X_i(\omega)) - \int f_D d\mu \right| > \frac{1}{k} \right\}$$

is finite, i.e.,

$$\sum_{n=1}^{\infty} \mathbb{P}\{E_n\} = \sum_{n=1}^{\infty} \mathbb{P} \left\{ \sup_{f_D \in \mathcal{F}_{\mathcal{D}}} \left| \frac{1}{n} \sum_{i=1}^n f_D(X_i(\omega)) - \int f_D d\mu \right| > \frac{1}{k} \right\} < \infty,$$

then the probability that infinitely many of them occur is 0, i.e.,  $\mathbb{P}\{\limsup_{n \rightarrow \infty} E_n\} = 0$ , or else,

$$\limsup_{n \rightarrow \infty} \sup_{f_D \in \mathcal{F}_{\mathcal{D}}} \left| \frac{1}{n} \sum_{i=1}^n f_D(X_i) - \int f_D d\mu \right| \leq \frac{1}{k} \quad \text{almost surely,} \tag{84}$$

for each  $k \in \mathbb{N}_+$ . Hence with probability one

$$\limsup_{n \rightarrow \infty} \sup_{f_D \in \mathcal{F}_{\mathcal{D}}} \left| \frac{1}{n} \sum_{i=1}^n f_D(X_i) - \int f_D d\mu \right| \leq \frac{1}{k} \quad \text{for all } k \in \mathbb{N}_+,$$

which implies (82). Since the above hold for any  $\mu \in \bar{\mathcal{P}}$ , the class  $\mathcal{F}_{\mathcal{D}}$  has the UCEM property with respect to  $\bar{\mathcal{P}}$ .  $\square$

### A.3. Proof of Proposition 1

*Proof.* Let  $\mathcal{F}_{\mathcal{D}, \varepsilon} = \{f_1, \dots, f_N\}$  be an  $\varepsilon$ -covering of  $\mathcal{F}_{\mathcal{D}}$  with minimal cardinality  $N = \mathcal{N}_{\infty}(\varepsilon, \mathcal{F}_{\mathcal{D}})$ . We have

$$\begin{aligned} \sup_{f_D \in \mathcal{F}_{\mathcal{D}}} \left| \frac{1}{n} \sum_{i=1}^n f_D(X_i) - \int f_D d\mu \right| &\leq \sup_{f_D \in \mathcal{F}_{\mathcal{D}}} \left| \frac{1}{n} \sum_{i=1}^n f_D(X_i) - \frac{1}{n} \sum_{i=1}^n f(X_i) + \frac{1}{n} \sum_{i=1}^n f(X_i) \right. \\ &\quad \left. - \int f d\mu + \int f d\mu - \int f_D d\mu \right| \\ &\leq \|f_D - f\|_{\infty} + \sup_{f \in \mathcal{F}_{\mathcal{D}, \varepsilon}} \left| \frac{1}{n} \sum_{i=1}^n f(X_i) - \int f d\mu \right| \\ &\quad + \|f_D - f\|_{\infty} \\ &= 2\|f_D - f\|_{\infty} + \sup_{f \in \mathcal{F}_{\mathcal{D}, \varepsilon}} \left| \frac{1}{n} \sum_{i=1}^n f(X_i) - \int f d\mu \right| \\ &< 2\varepsilon + \sup_{f \in \mathcal{F}_{\mathcal{D}, \varepsilon}} \left| \frac{1}{n} \sum_{i=1}^n f(X_i) - \int f d\mu \right|. \end{aligned} \quad (85)$$

Using Hoeffding's inequality and the union bound

$$\mathbb{P} \left\{ \sup_{f \in \mathcal{F}_{\mathcal{D}, \varepsilon}} \left| \frac{1}{n} \sum_{i=1}^n f(X_i) - \int f d\mu \right| \geq \xi \right\} \leq 2N \exp \left( -\frac{2n\xi^2}{e_h(T)^2} \right). \quad (86)$$

Set

$$\delta := 2N \exp \left( -\frac{2n\xi^2}{e_h(T)^2} \right) = 2 \left( \frac{3C_{\mathcal{D}}}{\varepsilon} \right) \exp \left( -\frac{2n\xi^2}{e_h(T)^2} \right), \quad (87)$$

and note, that after some calculations,

$$\xi = e_h(T) \sqrt{\frac{\log(\frac{2}{\delta}) + md \log(\frac{3C_{\mathcal{D}}}{\varepsilon})}{2n}}. \quad (88)$$

Thus, with probability at least  $1 - \delta$ ,

$$\sup_{f \in \mathcal{F}_{\mathcal{D}, \varepsilon}} \left| \frac{1}{n} \sum_{i=1}^n f(X_i) - \int f d\mu \right| < e_h(T) \sqrt{\frac{\log(\frac{2}{\delta}) + md \log(\frac{3C_{\mathcal{D}}}{\varepsilon})}{2n}}. \quad (89)$$

From (85) and (89)

$$\begin{aligned} \sup_{f_D \in \mathcal{F}_{\mathcal{D}}} \left| \frac{1}{n} \sum_{i=1}^n f_D(X_i) - \int f_D d\mu \right| &\leq 2\varepsilon + \sup_{f \in \mathcal{F}_{\mathcal{D}, \varepsilon}} \left| \frac{1}{n} \sum_{i=1}^n f(X_i) - \int f d\mu \right| \\ &\leq \frac{2}{n} + e_h(T) \sqrt{\frac{\log(\frac{2}{\delta}) + md \log(\frac{3C_{\mathcal{D}}}{\varepsilon})}{2n}} \quad (\text{for } \varepsilon = 1/n) \\ &\leq \frac{2}{n} + e_h(T) \sqrt{\frac{\log(\frac{2}{\delta})}{2n}} + \sqrt{\frac{md \log(3n C_{\mathcal{D}})}{2n}}, \end{aligned} \quad (90)$$

with probability at least  $1 - \delta$ . The proof is now finished.  $\square$



#### A.4. Proof of Lemma 2

*Proof.* We follow the same arguments as in the proof of Lemma 10 in (Gribonval et al., 2015b). Without loss of generality assume that the support of the probability measure  $\mu$  is within the unit ball, i.e., for any  $X \sim \mu$  it holds  $\|X\| \leq 1$ . First, we show that for  $c = \frac{1}{\sqrt{8}}$ ,

$$\Gamma_n(c\tau) := \sup_{f_D \in \mathcal{F}_{\mathcal{D}}} \mathbb{P} \left\{ \left| \frac{1}{n} \sum_{i=1}^n f_D(X_i) - \int f_D d\mu \right| \geq c\tau \right\} \leq 2e^{-n\tau^2}. \quad (91)$$

For fixed  $D \in \mathcal{D}$  the random variables  $f_D(X_i), i \in \{1, \dots, n\}$  are independent. When samples are drawn according to  $\mu$ ,

$$f_D(X_i) \leq e_h(\|X_i\|_2) \leq \frac{1}{2}\|X_i\| \leq \frac{1}{2}.$$

Using Hoeffding's inequality

$$\mathbb{P} \left\{ \left| \frac{1}{n} \sum_{i=1}^n f_D(X_i) - \int f_D d\mu \right| \geq c\tau \right\} \leq 2e^{-8c^2n\tau^2},$$

which implies that

$$\Gamma_n(c\tau) \leq 2e^{-n\tau^2}, \quad (92)$$

for  $c = \frac{1}{\sqrt{8}}$ . Now assume that (91) is true. Let  $\mathcal{N}(\varepsilon, \mathcal{D}, \|\cdot\|_{1,2})$  be an  $\varepsilon$ -cover of  $\mathcal{D}$  and  $L > \frac{d\hat{g}^{-1}(1)}{2}$ ; recall that  $\frac{d\hat{g}^{-1}(e_h(T))}{2}$  is the Lipschitz constant of the map  $F : (\mathcal{D}, \|\cdot\|_{1,2}) \mapsto (\mathcal{F}_{\mathcal{D}}, \|\cdot\|_{\infty})$ . For a fixed dictionary  $D \in \mathcal{D}$  there exists an index  $j(D)$  such that  $\|D - D_j\|_{1,2} \leq \varepsilon$ . Then

$$\begin{aligned} \left| \frac{1}{n} \sum_{i=1}^n f_D(X_i) - \int f_D d\mu \right| &\leq \left| \frac{1}{n} \sum_{i=1}^n f_D(X_i) - \frac{1}{n} \sum_{i=1}^n f_{D_j}(X_i) + \frac{1}{n} \sum_{i=1}^n f_{D_j}(X_i) \right. \\ &\quad \left. - \int f_{D_j} d\mu + \int f_{D_j} d\mu - \int f_D d\mu \right| \\ &\leq \|f_D - f_{D_j}\|_{\infty} + \sup_{j \in \{1, \dots, \mathcal{N}(\varepsilon, \mathcal{D}, \|\cdot\|_{1,2})\}} \left| \frac{1}{n} \sum_{i=1}^n f_{D_j}(X_i) - \int f_{D_j} d\mu \right| \\ &\quad + \|f_D - f_{D_j}\|_{\infty} \\ &= 2\|f_D - f_{D_j}\|_{\infty} + \sup_{j \in \{1, \dots, \mathcal{N}(\varepsilon, \mathcal{D}, \|\cdot\|_{1,2})\}} \left| \frac{1}{n} \sum_{i=1}^n f_{D_j}(X_i) - \int f_{D_j} d\mu \right| \\ &\leq 2L\varepsilon + \sup_{j \in \{1, \dots, \mathcal{N}(\varepsilon, \mathcal{D}, \|\cdot\|_{1,2})\}} \left| \frac{1}{n} \sum_{i=1}^n f_{D_j}(X_i) - \int f_{D_j} d\mu \right| \\ &\leq 2L\varepsilon + c\tau \end{aligned} \quad (93)$$

which holds with probability at least  $1 - \mathcal{N}(\varepsilon, \mathcal{D}, \|\cdot\|_{1,2}) \cdot \Gamma_n(c\tau)$ . Since this is true for any  $\varepsilon, \tau > 0$ , set

$$\varepsilon = \frac{c\sqrt{\beta}}{2L} \sqrt{\frac{\log(n)}{n}} \quad \text{and} \quad \tau = \sqrt{\frac{md \log\left(\frac{3}{\varepsilon}\right) + t}{n}} = \sqrt{md \log\left(\frac{6L}{c\sqrt{\beta}}\right) + \frac{md}{2} \log\left(\frac{n}{\log(n)}\right) + t} \cdot \frac{1}{\sqrt{n}}. \quad (94)$$

The assumption  $\frac{n}{\log n} \geq \max\left\{8, \left(\frac{c}{2L}\right)^2 \beta\right\}$ ,  $c = \frac{1}{\sqrt{8}}$ , implies that

$$\begin{aligned} \frac{c\sqrt{\beta}}{2L} \sqrt{\frac{\log(n)}{n}} &\leq \frac{c\sqrt{\beta}}{2L} \frac{1}{\sqrt{\max\left\{8, \frac{c^2}{4L^2} \beta\right\}}} \\ &= \sqrt{\frac{\frac{c^2 \beta}{4L^2}}{\max\left\{8, \frac{c^2 \beta}{4L^2}\right\}}} \\ &\leq 1. \end{aligned} \quad (95)$$

This shows that  $0 < \varepsilon \leq 1$ . Since  $\beta \geq 1$  and  $\log(n) \geq 1$ , we have

$$\begin{aligned}
 2L\varepsilon + c\tau &= 2Lc\sqrt{\beta}\frac{1}{2L}\sqrt{\frac{\log(n)}{n}} + c\sqrt{md\log\left(\frac{6L}{c\sqrt{\beta}}\right) + \frac{md}{2}\log\left(\frac{n}{\log(n)}\right) + t \cdot \frac{1}{\sqrt{n}}} \\
 &\leq c\sqrt{\frac{\beta\log(n)}{n}} + c\sqrt{md\log\left(\frac{6L}{c\sqrt{\beta}}\right) + \frac{md}{2}\log(n) + t \cdot \frac{1}{\sqrt{n}}} \quad (\text{since } \log(n) \geq 1) \\
 &\leq c\sqrt{\frac{\beta\log(n)}{n}} + c\sqrt{md\log\left(\frac{6L}{c}\right) + \frac{md}{2}\log(n) + t \cdot \frac{1}{\sqrt{n}}} \quad (\text{since } \beta \geq 1) \\
 &\leq c\sqrt{\frac{\beta\log(n)}{n}} + c\sqrt{\beta + \frac{\beta}{2}\log(n) + t \cdot \frac{1}{\sqrt{n}}} \quad \left(\text{since } \beta := md \max\left\{\log\left(\frac{6L}{c}\right), 1\right\}\right) \\
 &\leq c\sqrt{\frac{\beta\log(n)}{n}} + c\sqrt{\frac{\beta\log(n)}{2n}} + c\sqrt{\frac{\beta+t}{n}} \\
 &\leq 2c\sqrt{\frac{\beta\log(n)}{n}} + c\sqrt{\frac{\beta+t}{n}}.
 \end{aligned} \tag{96}$$

Hence for  $c = \sqrt{\frac{1}{8}}$ ,

$$\sup_{f_D \in \mathcal{F}_{\mathcal{D}}} \left| \frac{1}{n} \sum_{i=1}^n f_D(X_i) - \int f_D d\mu \right| \leq \frac{2}{\sqrt{8}} \sqrt{\frac{\beta\log(n)}{n}} + \frac{1}{\sqrt{8}} \sqrt{\frac{\beta+t}{n}} \tag{97}$$

with probability at least  $1 - 2e^{-t}$ . The proof is now finished.  $\square$

#### A.5. Discussion: The case of a separable, continuous, even, and bounded $g$

As already mentioned, Theorem 1 covers a wide range of separable functions  $g : \mathbb{R}^d \rightarrow \mathbb{R}_+$  but it does not cover popular (separable) penalty functions, like the SCAD or MCP,

$$\hat{g}_{scad}(t; \lambda, \gamma) = \begin{cases} \lambda t, & t \leq \lambda \\ \frac{\lambda\gamma t - \frac{1}{2}(t^2 + \lambda^2)}{\gamma - 1}, & \lambda < t \leq \gamma\lambda \\ \frac{\lambda^2(\gamma^2 - 1)}{2(\gamma - 1)}, & t > \gamma\lambda. \end{cases} \quad \text{and} \quad \hat{g}_{mcp}(t; \lambda, \gamma) = \begin{cases} \lambda t - \frac{t^2}{2\gamma}, & t \leq \lambda \\ \frac{1}{2}\gamma\lambda^2, & t > \gamma\lambda. \end{cases} \tag{98}$$

The functions  $\hat{g}_{scad}$  and  $\hat{g}_{mcp}$  are bounded from above and so they fail to satisfy the ‘‘strictly increasing’’ assumption of Section 3. A closer look at the proof of Lemma 7 reveals that if

$$e_h(T) < \sup_{t \in \mathbb{R}} \hat{g}_{mcp}(t; \lambda, \gamma), \tag{99}$$

then the following set of implications are true:

$$\begin{aligned}
 a \in \mathcal{U}_0^D(x) &\Rightarrow g_{mcp}(a; \lambda, \gamma) \leq e_h(\|x\|_2) \quad (\text{from inequalities (64) and (65)}) \\
 &\Rightarrow \sum_{i=1}^d \hat{g}_{mcp}(a_i; \lambda, \gamma) \leq e_h(\|x\|_2) \\
 &\Rightarrow \max_{1 \leq i \leq d} \hat{g}_{mcp}(a_i; \lambda, \gamma) \leq e_h(\|x\|_2) \\
 &\Rightarrow |a_i| \leq \hat{g}_{mcp}^{-1}(e_h(\|x\|_2); \lambda, \gamma) \quad (\text{since } \hat{g}_{mcp} \text{ is invertible in } [0, e_h(T)] \text{ due to (99)}) \\
 &\Rightarrow \|a\|_1 \leq d\hat{g}_{mcp}^{-1}(e_h(\|x\|_2); \lambda, \gamma).
 \end{aligned} \tag{100}$$

The above reasoning also applies to  $g_{scad}$ . Summarizing, the following lemma is proved.

**Lemma 10.** *Let a separable function  $g : \mathbb{R}^d \rightarrow \mathbb{R}_+$  of the form  $g(a) = \sum_{i=1}^d \hat{g}(a_i)$ , where  $\hat{g} : \mathbb{R} \rightarrow \mathbb{R}_+$  is continuous, even, strictly increasing up to some point on  $[0, +\infty)$  and then constant. If*

$$e_h(T) < \sup_{t \in \mathbb{R}} \hat{g}(t), \tag{101}$$

then the following set of implications hold true

$$a \in \mathfrak{U}_0^D(x) \Rightarrow g(a) \leq e_h(\|x\|_2) \Rightarrow \|a\|_1 \leq C_{D,x}, \quad (102)$$

where  $C_{D,x} := d\hat{g}^{-1}(e_h(\|x\|_2))$  and  $\hat{g}^{-1} : \mathbb{R}_+ \rightarrow \mathbb{R}_+$  denotes the inverse function of  $\hat{g}$  restricted on the domain where  $\hat{g}$  is strictly increasing.  $\square$

The next Proposition is an analog of Proposition 7 and an immediate consequence of expression (102).

**Proposition 8.** For any  $x \in \mathbb{B}_{\mathbb{R}^m}(T)$ ,  $D \in \mathfrak{D}$ , and  $g : \mathbb{R}^d \rightarrow \mathbb{R}_+$  satisfying assumptions of Lemma 10,

$$\sup_{a \in \mathfrak{U}_0^D(x)} \|a\|_1 \leq d\hat{g}^{-1}(e_h(T)). \quad (103)$$

Thus the map  $F : (\mathfrak{D}, \|\cdot\|_{1,2}) \mapsto (\mathcal{F}_{\mathfrak{D}}, \|\cdot\|_{\infty})$  is Lipschitz continuous,

$$\|F(D) - F(D')\|_{\infty} \leq C_{\mathfrak{D}} \|D - D'\|_{1,2}, \quad (104)$$

with Lipschitz constant  $C_{\mathfrak{D}} := \frac{d\hat{g}^{-1}(e_h(T))}{2}$ .  $\square$

The rest of results in Section 3 still remain valid for any function  $g$  under consideration; even Lemma 4 as mentioned in Remark 3. So, the family of functions  $\mathcal{F}_{\mathfrak{D}}$  retains the UCEM property for  $\bar{\mathcal{P}}$  for any bounded separable penalty function  $g$  satisfying assumptions of Section 4.

### A.6. Proof of Proposition 2

*Proof.* The proof follows the lines of the proof of Theorem 20 in (Vainsencher et al., 2011); we only depart in the details. First note that the set  $\Sigma_k := \{a \in \mathbb{R}^d : |\{i : a_i \neq 0\}| = k\}$  of all  $k$ -sparse vectors in  $\mathbb{R}^d$  is the union of  $\binom{d}{k}$  sets  $\Sigma_k^l$ ,

$$\Sigma_k^l := \{a \in \mathbb{R}^d : a_i \neq 0, \forall i \in I_l \text{ and } a_i = 0, \forall i \notin I_l\}, \quad l = 1, \dots, \binom{d}{k}, \quad (105)$$

where  $I_l$  is one of the  $\binom{d}{k}$  possible  $k$ -tuples in  $\{1, \dots, d\}$ ; in other words,

$$\Sigma_k = \bigcup_{l=1}^{\binom{d}{k}} \Sigma_k^l. \quad (106)$$

The proof is constructive; first it is shown that for any  $D \in \mathfrak{D}$  there exist  $\gamma > 0$  and  $q \in \mathbb{S}^{m-1}$  such that  $f_D(q) > \gamma$ . Let  $\mu$  be the uniform measure on the unit sphere  $\mathbb{S}^{m-1} := \{x \in \mathbb{R}^m : \|x\|_2 = 1\}$ . Denote as  $A_c$  the probability assigned by  $\mu$  to the set “within  $e_h(c)$ ” of a  $k$ -dimensional subspace,  $c > 0$ . For example, when  $m = 3$  and  $k = 1$ , the probability  $A_c$  can be defined as

$$A_c = \mu \left\{ x \in \mathbb{S}^2 : \exists t \in \mathbb{R} \text{ and } z = te_1 \text{ such that } e_h(\|x - z\|_2) \leq e_h(c) \right\},$$

where  $e_1 = (1, 0, 0)^\top$ . As  $c \searrow 0$ ,  $A_c$  also tends to zero. Then there exist  $c > 0$  such that  $\binom{d}{k} A_c < 1$ ; for that  $c$  and any  $D \in \mathfrak{D}$  there exists a set of positive measure, say  $\tilde{A}_c$ , on which  $f_D(x) > e_h(c) = \gamma$ . Indeed, for every  $l \in \{1, \dots, \binom{d}{k}\}$ , the following inclusion is valid

$$\left\{ x \in \mathbb{S}^{m-1} : \min_{a \in \Sigma_k^l} e_h(\|x - Da\|_2) \leq e_h(c) \right\} \subseteq A_c$$

by definition of  $A_c$ . Along with assumption  $\binom{d}{k} A_c < 1$ , the assertion that for any  $D \in \mathfrak{D}$  there exists a  $q$  such that  $f_D(q) > 0$  holds true.

Let  $q$  be a sample point in  $\tilde{A}_c$  and assume without loss of generality that  $\sum_{j=1}^{k-1} q_j > 0$ . Next construct two dictionaries  $D, D'$  such that  $f_D(q) > 0$  while  $f_{D'}(q) = 0$ . First construct dictionary  $D$ ; its first  $k-1$  columns are the standard basis vectors in  $\mathbb{R}^m$ ,  $\{e_1, \dots, e_{k-1}\}$ , its  $k$ -th column is

$$D_{\cdot,k} = \frac{1}{\sqrt{k-1}} \sum_{j=1}^{k-1} \sqrt{1 - \varepsilon^2/4} e_j + \varepsilon e_k/2,$$

and the remaining columns are arbitrary unit-norm vectors. Now  $D'$  is constructed; it is identical to  $D$  with the only difference being in the  $k$ -th column. Specifically,

$$D'_{\cdot,k} = \frac{1}{\sqrt{k-1}} \sum_{j=1}^{k-1} \sqrt{1-\varepsilon^2/4} e_j + lq,$$

for some  $l \in \mathbb{R}$  such that  $\|D'_{\cdot,k}\|_2 = 1$ , or else,

$$\begin{aligned} \|D'_{\cdot,k}\|_2 = 1 &\Leftrightarrow \|D'_{\cdot,k}\|_2^2 = 1 \\ &\Leftrightarrow \|lq\|_2^2 + 2l\sqrt{\frac{1-\varepsilon^2/4}{k-1}} \sum_{j=1}^{k-1} q_j - \varepsilon^2/4 = 0 \\ &\Leftrightarrow l^2 + 2l\sqrt{\frac{1-\varepsilon^2/4}{k-1}} \sum_{j=1}^{k-1} q_j - \varepsilon^2/4 = 0 \quad (\text{since } \|q\|_2^2 = 1). \end{aligned}$$

The roots of the previous quadratic equation (with respect to  $l$ ) are

$$l = \begin{cases} -\frac{2\sqrt{\frac{1-\varepsilon^2/4}{k-1}} \sum_{j=1}^{k-1} q_j}{2} - \sqrt{\left(\frac{2\sqrt{\frac{1-\varepsilon^2/4}{k-1}} \sum_{j=1}^{k-1} q_j}{2}\right)^2 + \frac{\varepsilon^2}{4}} \\ \sqrt{\left(\frac{2\sqrt{\frac{1-\varepsilon^2/4}{k-1}} \sum_{j=1}^{k-1} q_j}{2}\right)^2 + \frac{\varepsilon^2}{4}} - \frac{2\sqrt{\frac{1-\varepsilon^2/4}{k-1}} \sum_{j=1}^{k-1} q_j}{2}, \end{cases}$$

which after some simple algebraic manipulations implies that  $l \leq \varepsilon/2$  (to see this recall that  $\sum_{j=1}^{k-1} q_j > 0$  and use the inequality  $b^r - a^r \leq (b-a)^r$  for any  $0 < r < 1$  and  $0 < a \leq b$ ). For this  $q$  there exist  $t_j \in \mathbb{R}$ ,  $j \in \{1, \dots, k\}$ , such that  $q = \sum_{j=1}^k t_j D'_{\cdot,j}$  and thus  $f_{D'}(q) = 0$ , proving the second part of the theorem. On the other hand

$$\|D - D'\|_2 = \|\varepsilon e_k/2 - lq\|_2 \leq \|\varepsilon e_k/2\|_2 + \|lq\|_2 = \varepsilon/2 + \varepsilon/2 = \varepsilon,$$

and the proof is now completed. □

### A.7. Proof of Proposition 3

*Proof.* Fix  $D \in \mathfrak{D}$  and define the (possibly multivalued) map  $\hat{a}_D : \mathbb{R}^m \rightrightarrows \mathbb{R}^d$  as

$$\hat{a}_D(x) := \arg \min_{a \in \Sigma_k} e_h(\|x - Da\|_2); \quad (107)$$

this map maps any vector  $x \in \mathbb{R}^m$  to an optimal solution  $\hat{a}_D(x) \in \mathbb{R}^d$ . For that  $D$  the corresponding subgraph in the family of subgraphs

$$\mathcal{F}_{\mathfrak{D}}^+ := \left\{ \{(x, t) \in \mathbb{R}^{m+1} : f_D(x) \geq t\}; f_D \in \mathcal{F}_{\mathfrak{D}} \right\} \quad (108)$$

is described by the set of points  $(x, t)$ ,  $t \geq 0$ , for which

$$e_h(\|x - D\hat{a}_D(x)\|_2) \geq t. \quad (109)$$

Due to monotonicity of  $e_h$ , point  $(x, t)$  with  $t \geq 0$  satisfies (109) if and only if,

$$\|x - D\hat{a}_D(x)\|_2 \geq c(t), \quad (110)$$

where  $c(t)$  is the smallest value of  $c$  for which  $e_h(c) \geq t$ . In view of (110), if the set  $\{(x_i, t_i)\}_{i=1}^n$  is shattered by  $\mathcal{F}_{\mathfrak{D}}^+$ , then there exist matrix  $D_0$  in  $\mathfrak{D}$  and vectors  $\{\hat{a}_{D_0}(x_i)\}_{i=1}^n$  in  $\mathbb{R}^d$  such that, for those shattered points, it holds true

$$\|x_i - D_0 \hat{a}_{D_0}(x_i)\|_2^2 \geq c(t_i)^2. \quad (111)$$

We claim that the shatter coefficient of  $\mathcal{F}_{\mathfrak{D}}^+$  is upper bounded by the shatter coefficient of the collection of all subgraphs generated by functions which belong in

$$\mathcal{G} := \left\{ g_A(y, s) = \|Ay\|_2^2 + \beta s; A \in \mathbb{R}^{m \times (m+d)}, \beta \in \mathbb{R} \right\} \quad (112)$$

with  $(y, s) \in \mathbb{R}^{m+d} \times [0, +\infty)$ . Indeed, if some points in  $\{(x_i, t_i)\}_{i=1}^n$  are shattered by  $\mathcal{F}_{\mathcal{D}}^+$ , then for those shattered points it holds true that

$$\|x_i - D_0 \hat{a}_{D_0}(x_i)\|_2^2 \geq c(t_i)^2, \quad (113)$$

or equivalently,

$$\left\| \begin{bmatrix} I & -D_0 \\ \hat{a}_{D_0}(x_i) \end{bmatrix} \right\|_2^2 \geq c(t_i)^2. \quad (114)$$

Equivalence between the last two inequalities implies the existence of matrix  $A_0 = [I \ -D_0] \in \mathbb{R}^{m \times (m+d)}$ , scalar  $\beta_0 = 1$ , and vectors  $\{(y_i, s_i)\}_{i=1}^n \subset \mathbb{R}^{m+d} \times [0, +\infty)$  with

$$(y_i, s_i) := \left( \begin{bmatrix} x_i \\ \hat{a}_{D_0}(x_i) \end{bmatrix}, c(t_i) \right) \in \mathbb{R}^{m+d} \times [0, +\infty), \quad i = 1, \dots, n, \quad (115)$$

such that the graph of  $\|A_0 y\|_2^2 - \beta_0 s$ ,

$$\{(y, s) : \|A_0 y\|_2^2 - \beta_0 s \geq 0\}, \quad (116)$$

picks out only those  $(y_i, s_i)$  satisfying inequality (114); note that (116) is the subgraph of some function, sat  $g_{A_0}$ , in  $\mathcal{G}$ . Every set in (116) is the sum of an ellipsoid and a linear function of  $s$ . By Lemma 18 in (Pollard, 1984), the sets  $\{g_A \geq t\}$ , for  $g_A \in \mathcal{G}$ , pick out only a polynomial number of subsets from  $\{(y_i, s_i)\}_{i=1}^n$ ; those corresponding to functions in  $\mathcal{G}$  with  $A = [I \ D]$  pick out even fewer points from  $\{(y_i, s_i)\}_{i=1}^n$ . The VC dimension of  $\mathcal{G}$  is at most  $((m+d)^2 + 3(m+d))/2 + 1$ , see (Akama & Irie, 2011) for an improved bound on the VC dimension of ellipsoids. Consequently, monotonicity of  $e_h$  and Theorems 13.5, 13.9 in (Devroye et al., 1997) conclude the result

$$s(\mathcal{F}_{\mathcal{D}}^+, n) \leq \left( \frac{en}{\underbrace{((m+d)^2 + 3(m+d))/2 + 1}_{:= \alpha(m,d)}} \right)^{((m+d)^2 + 3(m+d))/2 + 1}. \quad (117)$$

□

### A.8. Proof of Theorem 2

*Proof.* Proposition 3 and Corollary 29.1 in (Devroye et al., 1997) imply

$$\mathbb{P} \left\{ \sup_{f_D \in \mathcal{F}_{\mathcal{D}}} \left| \frac{1}{n} \sum_{i=1}^n f_D(X_i) - \int f_D d\mu \right| > \varepsilon \right\} \leq 8s(\mathcal{F}_{\mathcal{D}}^+, n) e^{-\frac{n\varepsilon^2}{32e_h(T)^2}}. \quad (118)$$

Since

$$\sum_{n=1}^{\infty} s(\mathcal{F}_{\mathcal{D}}^+, n) e^{-\frac{2n\varepsilon^2}{32e_h(T)^2}} < \infty, \quad (119)$$

for all  $\varepsilon > 0$ , by the Borel-Cantelli lemma (and arguments similar to the relevant part in the proof of Theorem 1)

$$\sup_{f_D \in \mathcal{F}_{\mathcal{D}}} \left| \frac{1}{n} \sum_{i=1}^n f_D(X_i) - \int f_D d\mu \right| \rightarrow 0 \quad \text{almost surely (as } n \rightarrow \infty), \quad (120)$$

for all probability measures  $\mu \in \bar{\mathcal{P}}$ . Thus  $\mathcal{F}_{\mathcal{D}}$  has the UCEM property for all  $\mu \in \bar{\mathcal{P}}$ . □

### A.9. Proof of Proposition 4

*Proof.* Set the right hand side of inequality (35) equal to  $\delta$  and solve with respect to  $\varepsilon$ . The result immediately follows. □

### A.10. Proof of Theorem 3

*Proof.* First we bound the shatter coefficient of family

$$\mathcal{F}_{\mathfrak{D}} := \left\{ f_D(x) = \inf_{a \in \mathbb{R}^d} \{e_h(\|x - Da\|_2) + g(a); D \in \mathfrak{D}\} \right\} \quad (121)$$

when  $g : \mathbb{R}^d \rightarrow [0, +\infty)$  is a bounded lsc function, i.e.,  $g(a) \leq M$  for some  $M > 0$  and all  $a \in \mathbb{R}^d$ . To this end, we follow the proof of Proposition 3 and only depart in details.

Fix  $D \in \mathfrak{D}$  and define

$$\hat{a}_D(x) := \arg \min_{a \in \mathbb{R}^d} e_h(\|x - Da\|_2) + g(a); \quad (122)$$

this (possibly multivalued) map maps any vector  $x \in \mathbb{R}^m$  to an optimal solution  $\hat{a}_D(x) \in \mathbb{R}^d$  for the minimization problem

$$\inf_{a \in \mathbb{R}^d} e_h(\|x - Da\|_2) + g(a). \quad (123)$$

For fixed  $D \in \mathfrak{D}$  and function  $f_D \in \mathcal{F}_{\mathfrak{D}}$ , the corresponding subgraph in the collection of sets

$$\mathcal{F}_{\mathfrak{D}}^+ := \left\{ \{(x, t) \in \mathbb{R}^{m+1} : f_D(x) \geq t\}; f_D \in \mathcal{F}_{\mathfrak{D}} \right\} \quad (124)$$

contains the points  $(x, t) \in \mathbb{R}^{m+1}$ ,  $t \geq 0$ , for which

$$f_D(x) \geq t \Leftrightarrow e_h(\|x - D\hat{a}_D(x)\|_2) + g(\hat{a}_D(x)) \geq t \Leftrightarrow e_h(\|x - D\hat{a}_D(x)\|_2) \geq t - g(\hat{a}_D(x)). \quad (125)$$

Due to boundedness of  $g$  and monotonicity of  $e_h$  a point  $(x, t)$  with  $t > 0$  satisfies (125) if and only if

$$\|x - D\hat{a}_D(x)\|_2 \geq c(t - M), \quad (126)$$

where  $c(t - M)$  is the smallest value of  $c$  for which  $e_h(c) \geq t - M$ . In view of (126), if the set  $\{(x_i, t_i)\}_{i=1}^n$  is shattered by  $\mathcal{F}_{\mathfrak{D}}^+$ , then there exist some matrix  $D_0$  in  $\mathfrak{D}$  and set of points  $\{\hat{a}_{D_0}(x_i)\}_{i=1}^n$  in  $\mathbb{R}^d$  such that

$$\|x_i - D_0 \hat{a}_{D_0}(x_i)\|_2^2 \geq c(t_i - M)^2, \quad (127)$$

for every shattered point  $(x_i, t_i)$  in  $\{(x_i, t_i)\}_{i=1}^n$ . The claim that the shatter coefficient of  $\mathcal{F}_{\mathfrak{D}}^+$  is upper bounded by the shatter coefficient of the family of subgraphs of the function class  $\mathcal{G}$  below

$$\mathcal{G} := \left\{ g_A(y, s) = \|Ay\|_2^2 + \beta s; A \in \mathbb{R}^{m \times (m+d)}, \beta \in \mathbb{R} \right\}, \quad (128)$$

is proven in the same way as the relevant part in the proof of Proposition 3. Hence we have proven that

$$s(\mathcal{F}_{\mathfrak{D}}^+, n) \leq \left( \frac{en}{\underbrace{((m+d)^2 + 3(m+d))/2 + 1}_{:= \alpha(m,d)}} \right)^{((m+d)^2 + 3(m+d))/2 + 1}. \quad (129)$$

Proof of inequality (40) follows the proof of Theorem 2 and the proof of (41) is the same as the proof of Proposition 1.  $\square$

### A.11. Discussion: A note on the approximation error when $m \gg d$

This is a discussion concerning the upper bound for the approximation error of Proposition 5 in the main text. Recall that for sufficiently large values of  $n$ , it holds true that  $\mathcal{R}(\hat{D}_n) = o(1) + \varepsilon_{\text{app}}$ , or else  $\mathcal{R}(\hat{D}_n) \simeq \varepsilon_{\text{app}} = \mathcal{R}(D^*)$ . What follows, is that we regard  $\mathcal{R}(D^*)$  as a function of  $d$  ( $\ll m$ ) and describe its rate of decrease as  $d \rightarrow m$ . The function class under study is

$$\mathcal{F}_{\mathfrak{D}} := \{f_D; D \in \mathfrak{D}\}, \quad (130)$$

and each  $f_D : \mathbb{R}^m \rightarrow [0, +\infty)$  has the form

$$f_D(x) := \inf_{a \in \mathbb{R}^d} \{e_h(\|x - Da\|_2) + 1_{\mathcal{K}}(a)\}. \quad (131)$$

Assumptions (H1)-(H6) are the key to the proof of Proposition 5 in the text; they implicitly restrict the shape of the Moreau envelope  $e_h$ . It can be shown that

$$\partial e_h(t) \subseteq t - P_h(t); \quad (132)$$

see Theorem 10.13 in (Rockafellar & Wets, 2009) and Proposition 7 in (Yu et al., 2015). The continuity of  $e_h$  and the differential inclusion in (132) give a description of the epigraph of  $e_h$  in  $[0, +\infty)$ . If the proximal map of  $h$  satisfies (H1)-(H6), then in the interval  $[0, \tau]$  the Moreau envelope behaves like the quadratic function  $t^2$ , i.e.,  $e_h \sim t^2$  as  $t \rightarrow 0_+$ .<sup>5</sup> Indeed, under assumption (H6), for  $t \in [0, \tau]$  it holds true that  $\partial e_h(t) \subseteq t - P_h(t) = t$  which implies the previous assertion. Since the proximal map  $P_h$  is monotone and non-decreasing on  $[0, +\infty)$  with  $0 \leq P_h(t) \leq t$ , it is always true that  $\partial e_h(t) \subseteq t - P_h(t) \leq t$  and consequently  $e_h(t) \leq ct^2$ , for some  $c > 0$  and any  $t \geq 0$  (recall that  $0 \leq e_h(0) \leq h(0) = 0$  by assumption). Assumptions (H1)-(H6) are valid for the proximal maps of the  $l_p$ -norm,  $0 \leq p < \infty$ , the SCAD, and the MCP univariate functions and many other pairs of  $(h, P_h)$ , see also (Antoniadis, 2007).

In order to upper bound the approximation error  $\mathcal{R}(D^*)$ , we use the quantization error (or else distortion error) for  $e_h$  which is defined as

$$E_{d,e_h} = \inf_{\{c_1, \dots, c_d\} \subset \mathbb{R}^m} \int \min_{j=1, \dots, d} e_h(\|x - c_j\|_2) d\mu, \quad (133)$$

and  $\{c_1, \dots, c_d\}$  is a subset of  $\mathbb{R}^m$  with  $d$  vectors. The rate of convergence of the quantization error  $E_{d,e_h}$  as  $d$  tends to  $+\infty$  is ruled by the following theorem.

**Theorem 4** (Delattre, Sylvain, et al (Delattre et al., 2004)). *Assume that  $V : \mathbb{R}_+ \rightarrow [0, +\infty)$  is a non-decreasing function satisfying  $V(0) = 0$  and  $V(t) \sim t^r$  as  $t \rightarrow 0_+$ ,  $r > 0$ . Assume also that there exists a non-decreasing function  $W : \mathbb{R}_+ \rightarrow [0, +\infty)$ , with  $W(0) \geq 1$ , such that  $V(t) \leq t^r W(t)$  for every  $t \in [0, +\infty)$ . If the random variable  $X$  satisfies  $\int \|X\|_2^r d\mu < \infty$  and  $\int W(\|X\|_2) d\mu < \infty$ , then*

$$E_{d,V} = \inf_{\{c_1, \dots, c_d\} \subset \mathbb{R}^m} \int \min_{j=1, \dots, d} V(\|x - c_j\|_2) d\mu \leq \mathcal{O}(d^{-r/m}), \text{ as } d \rightarrow +\infty; \quad (134)$$

here,  $m$  is the dimension of  $X$  and  $d$  is the number of vectors in  $\{c_1, \dots, c_d\}$ .

The assumptions in Theorem 4 are valid for the Moreau envelope of any function  $h$  whose proximal map  $P_h$  satisfies (H1)-(H6); as already mentioned, under assumptions (H1)-(H6), we have  $V(t) = e_h(t) \sim t^2$  locally around zero and  $V(t) = e_h(t) \leq ct^2$  for some  $c > 0$  and any  $t \geq 0$ . The approximation error  $\mathcal{R}(D^*)$  and the quantization error in (133) are related as follows:

$$\mathcal{R}(D^*) = \inf_{D \in \mathfrak{D}} \int f_D d\mu = \inf_{D \in \mathfrak{D}} \int \inf_{a \in \mathcal{K}} e_h(\|x - Da\|_2) d\mu \leq \inf_{D \in \mathfrak{D}} \int \min_{c' \in \{D_{\cdot,j}\}_{j=1}^d} e_h(\|x - c'\|_2) d\mu, \quad (135)$$

since the basis of the positive orthant belongs to  $\mathcal{K}$ . Therefore,

$$\inf_{D \in \mathfrak{D}} \int \min_{c' \in \{D_{\cdot,j}\}_{j=1}^d} e_h(\|x - c'\|_2) d\mu \geq \inf_{\{c_1, \dots, c_d\} \subset \mathbb{R}^m} \int \min_{j=1, \dots, d} e_h(\|x - c_j\|_2) d\mu = E_{d,e_h},$$

and we can carefully choose  $\{D_{\cdot,1}, \dots, D_{\cdot,d}\}$  such that equality is achieved, i.e.,

$$\inf_{D \in \mathfrak{D}} \int \min_{c' \in \{D_{\cdot,j}\}_{j=1}^d} e_h(\|x - c'\|_2) d\mu = \inf_{\{c_1, \dots, c_d\} \subset \mathbb{R}^m} \int \min_{j=1, \dots, d} e_h(\|x - c_j\|_2) d\mu = E_{d,e_h} \quad (136)$$

(equality always is achieved if the data points  $x$  are rescaled to lie inside the Euclidean ball  $\mathbb{B}_{\mathbb{R}^m}(1)$ ). In order to use Theorem 4, assume that i)  $m$  is sufficiently large and ii)  $d$  approaches  $m$ . Under these assumptions, Proposition 5 is an immediate corollary of inequality (135) and Theorem 4.

<sup>5</sup>The notation  $a_n \sim b_n$  means  $a_n = b_n + o(b_n)$ .
